# Supplementary material for: Fetal Calcifications Are Associated with Chromosomal Abnormalities
Source: PubMed Central journal article supplement (PMC4414523; doi:10.1371/journal.pone.0123343), 2015-04-29
Supplement: pone.0123343.s001.pdf [file pone.0123343.s001.pdf]

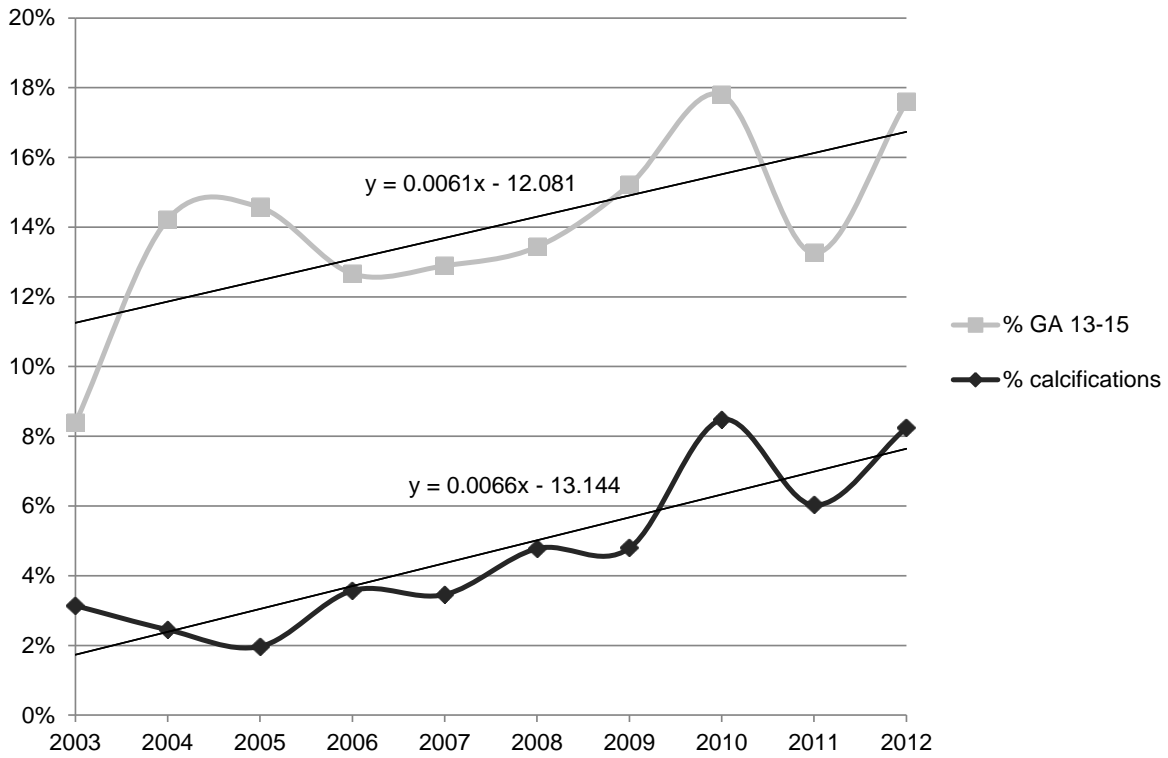

**S1 Fig. Increasing proportions of calcifications and gestational age interval 13-15.** The proportion of calcifications identified in fetal tissues at the Department of Pathology, Karolinska University Hospital, increased at a similar rate to the frequency of analyzed fetuses of gestational age (GA) 13-15.
